# Supplementary material
Source: PubMed Central journal article supplement (PMC2512972)
Supplement: NIHMS61246-supplement-si20060711_034.pdf [file NIHMS61246-supplement-si20060711_034.pdf]

## Supporting Information

### Anti-AIDS Agents 69. Moronic Acid and Other Triterpene Derivatives as Novel Potent Anti-HIV Agents

Donglei Yu, Yojiro Sakura, Chin-Ho Chen, Fang-Rong Chang, Li Huang, Yoshiki Kashiwada,  
and Kuo-Hsiung Lee\*

#### Elemental Analysis Data

| Compd.    | Formula                                         | Theory |       |       | Found |       |       |
|-----------|-------------------------------------------------|--------|-------|-------|-------|-------|-------|
|           |                                                 | C (%)  | H (%) | N (%) | C (%) | H (%) | N (%) |
| <b>16</b> | C <sub>36</sub> H <sub>58</sub> O <sub>4</sub>  | 77.93  | 10.54 |       | 77.77 | 10.50 |       |
| <b>17</b> | C <sub>36</sub> H <sub>54</sub> NO <sub>7</sub> | 72.21  | 9.09  |       | 72.30 | 8.90  |       |
| <b>18</b> | C <sub>42</sub> H <sub>65</sub> NO <sub>8</sub> | 70.85  | 9.20  | 1.97  | 71.14 | 9.18  | 2.22  |
| <b>19</b> | C <sub>42</sub> H <sub>69</sub> NO <sub>6</sub> | 73.75  | 10.17 | 2.05  | 73.59 | 10.20 | 1.99  |
| <b>20</b> | C <sub>42</sub> H <sub>67</sub> NO <sub>7</sub> | 72.81  | 9.68  | 2.01  | 71.98 | 9.72  | 2.01  |
| <b>21</b> | C <sub>47</sub> H <sub>77</sub> NO <sub>7</sub> | 73.49  | 10.10 | 1.82  | 73.12 | 9.95  | 1.76  |
| <b>22</b> | C <sub>47</sub> H <sub>77</sub> NO <sub>7</sub> | 73.49  | 10.10 | 1.82  | 73.36 | 10.10 | 1.78  |
